# Supplementary material for: Integration of machine learning and meta-analysis identifies the transcriptomic bio-signature of mastitis disease in cattle
Source: PLoS One. 2018 Feb 22;13(2):e0191227. doi: 10.1371/journal.pone.0191227 (PMC5823400; doi:10.1371/journal.pone.0191227)
Supplement: S1 Table — (XLSX) [file pone.0191227.s001.xlsx]

## Sheet: Metad
Standard expression value of differentially expressed genes achieved by meta-analysis (Meta-genes) were set as features or attributes, this new dataset (Metad) was used to import into RapidMiner Studio software.
Subject	March2	March3	ABHD2	ABO	ACOX2	ACP2	ACSL5 /// LOC100851804	ADA	ADAMTS1	ADAMTS4	ADHFE1	ADM	ADRB2	ADSSL1 /// LOC101908640	AES	AFAP1	AGPAT3	AGPAT9	AGR2	AIF1	AK4	AKIRIN2	ALAS1	ALDH1A3 /// LOC534200	ALOX15	ALOX15B	AMICA1	AMIGO3	AMPD2	ANAPC5	ANGPTL4	ANKFY1	ANTXR2	AP3S2	AP4S1	APBB1IP	APOA1	APOLD1	APRT	AQP3	ARF4 /// DENND6A /// LOC101903806	ARFGEF2	ARG2	ARHGAP19	ARHGAP26	ARHGEF2	ARID4B	ARL4A	ARMC8
Healthy	-0.12285	-0.391503	-1.528	1.94912	1.33231	0.287293	-0.979247	-1.50294	0.61508	-1.03776	-0.514577	-1.62582	-0.903014	0.190328	0.762808	-1.73697	-1.23057	0.114253	1.83051	1.74033	-0.617145	-1.06615	1.48421	-0.729744	1.33403	-1.19026	0.0932071	0.551751	-1.48477	-1.29016	-1.00642	0.0356348	-0.671243	-1.51003	0.0813667	0.133316	0.0598337	0.226907	0.50976	1.77376	-0.146972	-0.152498	-0.540793	-0.739826	1.57626	-0.700341	-0.630696	0.719047	-0.70618
Mastitis	-0.592316	-0.236209	-1.3259	1.86688	-0.199216	1.54795	-0.22334	1.10254	0.219429	-0.466464	-0.0446663	-0.854226	-0.95548	-0.556057	0.0390948	-0.639587	-0.745945	-0.165862	1.66107	1.22022	-0.264139	-0.79163	0.738394	-0.608117	0.0635813	-0.60962	1.1155	-0.488505	0.40113	-1.34142	-0.198455	0.491692	0.394143	-1.09161	1.21144	0.921456	0.303243	0.747312	0.335983	0.620488	1.01021	-0.961861	0.0171863	-0.603821	1.87982	-0.201724	0.270763	-0.0942972	-0.209402
Healthy	0.292483	-0.754754	-1.41716	-0.787483	2.32398	0.580093	-0.69643	-1.29851	-0.0739037	-1.23894	0.41063	-1.34961	-1.4982	-0.569613	0.653599	-1.48718	-0.860423	-0.3989	-0.369583	-0.360247	-0.504022	0.334173	-2.2308	-0.510952	0.501059	-1.36432	-0.155954	0.529987	-0.953251	-1.71946	-0.252328	0.0921813	-2.90518	-1.50021	1.15173	-0.0582707	-0.812792	0.727424	-1.29787	0.637625	0.145055	-0.674809	-0.327639	-1.2212	0.84629	-1.1105	0.847131	0.338036	-0.703932
Mastitis	-1.02274	0.433028	-0.826004	-0.494102	0.56489	2.09257	-0.0264313	0.44168	-0.00138455	-0.748566	-1.41006	-1.14983	-1.06391	-1.09916	-0.816366	-0.174126	0.0318251	0.533304	0.976517	1.19652	-0.352349	1.20457	-0.0433977	-0.349745	-0.0797686	-0.641131	2.64331	0.372212	0.802568	-1.09993	0.494576	1.36816	-0.8753	-0.556663	1.91471	1.47814	-0.704306	0.96219	0.290753	0.209764	1.89707	-0.221403	1.44336	-1.28928	1.37928	0.582745	1.69491	-0.253788	-0.0535928
Healthy	-0.826632	-0.483331	-1.82231	1.42944	0.738434	-0.13639	-0.655349	-0.857659	1.67818	-0.861763	0.728741	-1.19074	-0.774217	-0.220433	0.189821	-1.81259	-1.32196	-0.318863	1.492	0.821968	-0.675828	-0.991137	0.920871	-0.909885	1.21672	-0.805684	0.268652	-0.489102	-1.32995	-1.23451	-0.705599	0.36724	-0.494383	-1.30865	-0.130634	0.42278	-0.178255	-0.0380789	0.687057	1.20649	-0.050057	-0.760065	-1.1788	-0.545105	1.33688	-0.726376	0.970068	0.465461	-0.723487
Mastitis	-1.33217	-0.807868	-1.36235	1.16609	0.360546	1.21774	0.339057	-0.0307404	0.479004	-0.309725	0.522746	-1.74002	-0.249712	-0.935655	-0.114443	-0.437976	-0.94139	-0.334896	1.08377	1.89444	-0.326246	-0.493012	2.7542	0.137254	0.21129	0.919311	0.885993	-0.951416	0.589366	-1.28853	1.27525	1.16624	0.641819	-0.760908	0.359113	1.26532	0.575974	0.311237	1.62068	0.14743	0.73591	-1.29082	-0.0229395	1.12314	1.80976	0.571352	2.10261	0.331852	0.180587
Healthy	-0.134125	-1.04151	-1.38302	2.11105	2.0624	0.0651339	-0.851168	-0.928536	1.57186	-1.26178	0.766453	-0.929095	-1.05868	-0.0672921	0.525913	-1.67721	-1.05803	-0.309545	1.39657	-0.172427	-0.610739	-0.785489	0.962591	-1.02801	0.951258	-0.922499	0.266359	-1.26353	-1.72097	-1.68681	-1.02151	0.390506	-0.710477	-1.87699	-0.332435	-0.117915	-0.263718	0.289676	0.246464	1.03375	-0.65495	-0.952505	-2.25068	-0.27491	1.73183	-0.812717	1.37559	0.196972	-0.498736
Mastitis	-0.534569	-0.551804	-1.32904	2.30266	-0.368337	1.66737	-0.552209	0.2129	0.731175	-0.896344	-0.0643399	-1.47609	-0.725104	-0.785161	-0.429696	-1.23804	-0.791435	0.112286	1.58994	1.05223	-0.539487	-0.659863	0.77882	-0.971399	0.250693	-0.331896	0.126053	0.0815439	0.430222	-1.34853	-0.424831	0.679805	0.107601	-0.3643	0.388118	0.607833	0.0839053	0.309814	1.11316	0.906637	0.802269	-0.449721	0.445438	-1.03766	1.92296	-0.258014	1.3987	0.111968	-0.215447
Healthy	0.213186	-0.578707	-1.2209	-0.843788	2.92195	-0.284649	-0.795854	-1.58428	0.215532	-0.950185	0.619938	-0.816603	-1.54782	-0.578299	0.412706	-0.961145	-1.05992	-0.180199	0.238541	-0.81317	-0.683253	0.620313	-1.1462	-0.667741	0.626608	-0.749536	0.0574147	0.811678	-0.801441	-1.1429	0.352218	0.348958	-2.74639	-0.561023	0.539899	-0.0182239	-0.710829	0.44786	-2.063	0.480015	0.0652555	-0.647916	-0.0343803	-0.656695	1.12011	-1.11196	1.11594	0.225182	-0.979721
Mastitis	-0.982395	0.611477	-0.915524	-0.387206	1.86427	1.86017	0.0451094	1.70061	1.02432	-0.0688482	-0.905582	-0.595646	-0.553175	-1.1923	-1.2016	-0.531756	-0.232974	0.312445	0.558665	-0.137443	-0.636009	0.8408	-0.167398	-0.0249101	0.214503	-0.562627	0.288999	0.842986	0.976108	-1.24347	1.29779	0.691168	-2.37731	-0.47036	1.64453	0.60655	-0.0362199	1.10147	1.03361	0.0979921	1.3414	-0.205149	0.953017	-1.39841	1.57517	-0.253824	1.06033	-0.807713	-0.238435
Mastitis	1.14474	-0.448581	-0.727436	1.79835	0.722633	-0.245384	-1.16967	0.0290443	0.844645	-0.778503	0.488345	0.366079	-0.544559	1.24811	0.897132	-0.768279	-1.22645	0.00168776	0.915307	0.903949	-0.721961	0.7046	-2.33238	-0.721428	1.2083	-1.88893	-0.347911	1.87336	-2.20986	-0.438242	-1.10679	-2.37419	-1.91535	-0.0568094	-0.124624	0.671679	-0.459271	2.06737	0.355278	1.17611	-2.38101	-0.107107	-1.43886	0.0343239	0.146581	-0.815351	0.469244	0.0888577	-0.499941
Mastitis	0.648244	-0.503054	-0.849692	1.66557	0.73354	-0.111044	-1.00153	-0.523021	0.734177	-0.650871	0.772834	0.614172	-1.15202	0.528929	0.594976	-1.68089	-0.87968	-0.231477	0.401917	0.199277	-0.62133	0.899012	-0.933733	-0.765006	0.906429	-1.1445	-0.226511	1.08759	-1.67245	0.0756922	-0.677863	-1.92318	-1.38997	0.615579	-1.39091	0.511616	0.310072	1.28403	-0.23949	1.44367	-0.882634	0.55507	-1.11159	0.267669	0.517098	-0.474324	0.271952	0.818799	0.0660954
Mastitis	0.449163	-0.51601	-0.533659	1.81756	-0.621678	0.0277553	-1.144	-0.983668	1.03713	-0.983227	0.416032	1.02956	-1.04437	0.7048	1.25632	-1.78506	-1.10654	-0.534416	1.34374	1.6645	-0.911951	0.511675	-2.01518	-0.830523	1.13979	-0.706045	-0.459764	2.44872	-2.04158	-0.406052	-0.721851	-1.92571	-2.1243	0.0546784	-1.1076	0.380938	-0.54492	1.54545	0.572074	1.4039	-1.46958	-0.00964867	-0.677996	-1.02545	1.0611	-0.909592	-0.138812	0.542815	-0.811349
Mastitis	1.32434	-0.788239	-0.768717	1.93468	0.626326	-0.656359	-1.26143	0.498095	0.626591	-0.635355	0.034303	0.547358	-0.943516	0.750735	1.1127	-1.05131	-0.891593	-0.25331	1.25985	0.866651	-0.73867	0.536673	-1.26493	-0.833214	1.19931	-1.53059	-0.41274	2.47242	-1.86997	0.224506	-0.866774	-2.19356	-1.92356	0.281992	-1.83972	0.00204647	-0.689878	1.05562	0.0435112	1.57582	-0.296465	1.02688	-1.42853	-1.50785	0.389492	-0.825684	-0.965117	0.947071	-0.116565
Mastitis	1.28176	-0.574628	-0.578652	1.90477	0.635505	0.255508	-1.36592	-1.03546	1.53619	-0.673662	0.836597	0.530082	-0.410175	1.12594	0.930418	-0.81376	-0.932118	-0.354316	0.748278	-0.33094	-0.991568	0.810606	-2.16593	-0.721362	1.28717	-0.808496	-0.0380925	1.30205	-2.0639	-0.026592	-0.590282	-1.68252	-2.03496	0.313749	-1.08599	-0.056105	-0.344948	1.82387	-0.642048	1.11965	-1.18033	0.863229	0.115994	-1.22463	0.47243	-0.662551	0.715739	0.865112	0.418901
Healthy	0.753758	-0.309004	-0.773362	1.61532	0.567373	-0.45652	-1.18715	1.20853	0.99846	-0.451492	0.0151243	0.368964	-0.615371	0.619927	0.28435	-1.98221	-0.727164	-0.61425	0.840896	0.618162	-0.81974	0.667683	-0.605298	-0.167118	1.52218	-0.904376	-0.0433932	2.3689	-1.50165	-0.292003	-0.752071	-2.52847	-1.47724	0.127642	-0.929983	0.513204	-1.20837	1.46845	-0.3364	1.42896	-0.325558	0.647088	-1.01389	-0.793195	0.728603	-0.243469	0.513773	0.0129595	0.130301
Healthy	0.230778	-0.765686	-0.921982	2.14494	0.352004	-0.497596	-1.19282	0.571867	0.66365	-0.636293	0.0270434	1.3736	-0.864757	0.799028	1.0503	-1.19878	-0.683958	-0.482779	0.59643	0.233331	-0.920317	0.580917	-0.853858	-0.684402	1.24261	-1.34946	0.0664841	1.02783	-1.66961	-0.176041	-0.866783	-1.05758	-1.35707	0.249353	-1.3917	0.223333	0.164318	1.18645	-0.173129	1.25497	-1.50598	1.14159	-1.74514	-0.404993	0.519737	-0.315287	0.130907	0.338608	0.0639677
Healthy	0.904098	-0.573586	-0.834751	2.08021	1.37451	-0.576965	-1.12687	-0.26612	0.210219	-0.674851	0.225405	0.108055	-1.0399	0.765545	1.02361	-1.53532	-0.733444	-0.411347	1.44094	0.69184	-0.815327	0.632053	-0.754029	-0.482977	1.46085	-1.41532	-0.418388	2.03571	-1.73471	-0.214394	-0.779613	-2.25273	-1.43481	-0.115392	-1.45778	0.10682	-0.315186	0.761698	0.452439	1.52734	-1.10302	0.768155	-1.3221	-0.834243	0.607468	-0.506941	-0.114733	0.67349	-0.0201392
Healthy	0.534337	-0.364653	-0.513949	1.86836	-0.480332	-0.236811	-1.06497	-0.132194	0.783725	-0.427212	0.585676	0.868687	-0.869603	0.741611	0.756381	-0.809985	-1.27702	-0.296609	1.77156	1.6991	-0.695469	0.81194	-1.34781	-0.497606	1.47675	-1.37031	-0.292956	2.9563	-1.63298	-0.671607	-0.584782	-2.47917	-2.22994	-0.622277	-0.520054	0.695393	0.238032	0.640812	0.272021	1.24685	-0.327962	-0.0628578	-1.20519	-0.503312	0.400857	-0.385534	0.0376252	0.689984	-0.415124
Healthy	0.290576	-0.248035	-0.535429	2.08282	-0.220254	-0.0465534	-1.48379	0.437252	0.286784	-0.568828	0.887592	0.986293	-0.930496	1.08659	0.942741	-1.01249	-0.34734	-0.331708	1.52789	1.2912	-0.865493	0.594759	-1.94686	-0.711171	1.36196	-0.722179	-0.50853	2.73066	-1.8503	-0.682768	-0.884742	-2.93144	-1.79346	-0.579728	-0.358832	0.5574	-0.553965	1.71296	0.848528	1.17433	-0.38153	0.175466	-0.837621	-1.37852	0.593356	0.00193583	0.666081	1.09861	-0.558158
Mastitis	-0.312804	1.03481	-0.390517	1.48225	0.732934	1.53569	0.221917	2.63313	1.02802	0.890861	-1.45684	0.0976032	0.0120382	0.0655739	-2.82825	-0.145012	0.398745	0.856851	0.6426	-0.508002	-0.270565	1.03215	0.291922	-0.699177	-0.0955625	0.602033	-0.0087998	-0.536471	1.48304	-0.0284901	0.521241	1.65727	1.22899	0.865583	1.03167	1.2969	-2.41212	1.53423	-3.40469	-0.301658	0.890324	0.150401	1.30426	-1.24549	0.890463	-1.02835	1.58658	-0.954893	-0.614131
Mastitis	-0.356319	0.570108	-0.411815	1.33604	0.000399991	2.09188	-0.169614	1.44804	0.595084	0.25626	-0.834133	0.334135	-0.616684	0.0470249	-2.00159	-0.920787	0.0683699	0.820008	1.0765	1.54441	-0.653108	1.11105	-1.42227	-0.868252	-0.292344	-0.421305	1.3855	-0.760764	0.492794	-0.27031	-0.296459	0.890399	0.811091	0.398846	1.31222	1.54128	-1.60974	1.57625	0.215915	0.269728	1.4423	-0.272414	1.06622	-1.45506	0.507869	-1.10886	0.25318	-0.197998	-0.731516
Mastitis	-0.274499	0.805517	-0.528002	0.97355	-0.873495	1.89857	0.291518	3.13769	1.14998	0.928259	-1.24395	0.725975	0.233883	0.0984303	-1.83789	-0.964022	-0.199394	0.716825	0.511015	1.456	-0.584572	1.40198	-0.720862	-0.652315	-0.453329	0.43098	0.393642	-0.187857	0.965884	-0.556846	0.304209	1.1431	1.14282	0.37295	0.983179	1.87776	-1.50046	1.45338	0.695795	-0.136108	1.22262	-0.365352	1.54949	-1.49691	0.275912	-1.06325	0.509208	-1.34415	-0.549131
Mastitis	0.0604789	0.272459	-0.684836	1.23377	0.348938	1.52103	-0.000211281	2.38152	1.13119	0.064132	-0.601128	0.275111	-0.376413	0.34219	-1.24763	-1.15725	-0.104284	0.581039	0.437109	1.26419	-0.748357	1.12061	-0.897006	-0.737072	-0.298081	0.468775	1.18714	-0.425136	0.828764	-0.259889	0.290371	0.97486	0.694406	0.643748	1.15834	1.22806	-1.91823	1.50768	0.912852	0.49184	1.69797	0.0294969	1.10127	-1.04944	0.110158	-1.15621	-0.775416	-0.354381	-0.400536
Mastitis	0.33006	0.0323547	-0.778806	1.21322	-0.364852	1.46447	0.102858	1.66965	0.823989	0.0205781	0.335087	0.376056	-0.042987	0.532676	-0.929831	-0.0434428	-0.531959	0.270314	0.292106	3.14964	-0.24869	1.05282	0.673225	-0.0381181	-0.289032	1.47172	2.66807	-1.21498	0.664791	-0.683635	0.569386	1.34517	1.25644	0.355217	0.268159	1.81301	-0.187682	1.05724	2.0457	0.0532956	0.731265	-0.556145	-0.134081	-0.943328	0.280864	-1.53248	0.0734998	-0.253553	-0.505374
Healthy	1.35105	-0.336725	-0.840881	1.45821	0.957318	-0.353574	-1.15283	1.11513	1.04186	-0.66746	0.648323	0.539537	-0.376548	1.25385	0.415166	-1.03005	-1.18701	-0.415493	0.833246	0.984924	-0.692699	0.676507	-0.896209	-0.831648	1.30371	-1.07987	0.0676881	0.745256	-1.76608	-0.381332	-0.859816	0.284429	0.12061	-0.38335	-0.695706	0.40007	-1.71305	1.54831	-0.924103	1.2412	-1.39106	0.601069	-1.48167	-0.598669	0.377282	-2.23189	0.0715432	1.06685	-1.40473
Healthy	0.705428	-0.282191	-1.07622	1.97309	0.0825745	-0.675259	-1.11297	1.24293	0.978791	-0.486494	1.25548	1.12043	-0.457907	1.5619	0.54922	-1.27464	-1.26404	-0.560662	0.339425	0.566275	-0.578948	0.511611	-0.655337	-0.877826	1.07808	-0.649345	-0.111133	0.208359	-1.45164	-0.55143	-0.926647	0.33881	0.343626	-0.596541	-0.842521	0.568421	-0.485307	1.56117	-0.640475	1.03357	-0.867575	0.514969	-1.56513	-0.489793	0.365029	-1.99226	0.0887625	0.369064	-0.91039
Healthy	1.27541	-0.398655	-0.789218	1.9975	0.84364	-0.442844	-1.19356	0.285982	0.603819	-0.69491	0.909355	0.0721081	-0.722905	1.08672	0.707681	-0.541643	-1.41092	-0.555191	1.21511	0.854305	-0.825991	0.622586	-0.730866	-0.826556	1.29272	-0.405571	-0.313668	0.800164	-1.49817	-0.664573	-0.899744	-0.0825581	-0.0120945	-0.709379	-0.642964	0.139062	-1.04674	0.876934	-0.476222	1.41138	-0.954538	0.393235	-1.42147	-0.6655	0.244413	-2.50205	-1.14932	0.307374	-1.46564
Healthy	1.26312	-0.455362	-0.814839	1.69628	-0.476613	-0.316154	-1.1183	-0.133117	0.553783	-0.580279	0.933444	0.424472	-0.699534	1.71825	-0.0566255	-1.05434	-1.2384	-0.510285	1.20807	1.04384	-0.66275	0.759655	-0.698029	-0.827799	1.23239	-0.812843	-0.0714558	0.543553	-1.48513	-0.559132	-0.698079	0.113863	0.00653729	-0.413469	-0.907913	0.261567	-0.780019	0.684182	-0.788737	1.19427	-0.707418	0.375537	-1.55276	-0.390146	0.354974	-2.40294	-0.436413	0.599776	-1.65208
Healthy	1.31398	-0.120122	-0.74118	1.77709	-0.173813	-0.425224	-1.21047	0.65582	0.44817	-0.651873	1.05578	0.937557	-0.0759478	1.80467	0.531683	-1.05331	-1.03384	-0.331144	1.08533	1.08661	-0.885767	0.731755	-0.568552	-1.0967	1.18979	-0.737776	-0.259367	1.27203	-1.4197	-0.401161	-0.726543	0.200495	-0.2393	-0.25297	-1.03032	0.130292	-1.2313	1.69561	-0.0128402	1.28594	-0.700057	0.596625	-0.719014	-0.539201	0.20907	-2.3406	-1.82021	1.22189	-1.55035
Mastitis	-0.765417	-0.470453	-0.528746	0.647263	1.5381	1.24465	-0.0293925	2.33547	0.798415	-0.224579	-2.12111	-1.32076	0.477383	0.141521	0.25279	1.65487	-0.161935	0.359384	0.765266	0.0702244	-0.887635	1.51717	1.22357	0.453643	-0.637008	3.52406	0.757271	0.265762	2.0958	1.95429	2.08853	1.65921	0.780656	0.0440026	1.45957	1.2165	-0.531471	-1.20891	-0.168591	-0.569263	1.63307	0.792613	0.877147	-1.27805	0.984443	0.537017	-0.506691	-1.00013	0.155487
Healthy	1.59488	-0.96173	-0.946394	-0.745912	1.08405	-0.25479	-1.27564	0.317549	-1.14035	-1.25782	0.0901182	-0.287444	-0.905143	1.48565	0.505426	-0.623949	-0.0725647	-0.140956	0.462506	-1.09898	-1.08886	-1.103	-1.79985	-1.11166	1.44876	-0.777466	-0.135622	0.464419	-1.19855	-0.632176	-1.25204	0.0838943	-1.13258	-0.687201	-1.37267	-0.191363	0.468707	0.580308	-1.62058	1.13821	-0.80787	1.4379	-0.249756	1.83863	0.46603	-0.377131	0.344228	2.10394	-1.23633
Mastitis	0.679003	-1.26714	-0.581527	-0.97174	0.757558	-0.0853193	-0.225277	1.23814	-1.54791	-0.993004	-0.179083	-0.940244	0.101845	0.47699	0.964947	-0.0830509	-0.689854	-0.765066	-0.745432	0.770238	-0.668925	-0.789302	0.28007	0.352282	0.934305	1.8899	0.351487	-1.11062	0.39498	-0.980297	1.38866	0.256443	0.19517	-0.927934	-0.685764	1.40211	1.72343	0.794973	-0.736288	0.439681	-0.534755	0.913657	-0.924098	1.4555	1.00422	1.15751	1.10542	0.430018	-0.506711
Mastitis	-0.749498	-0.617511	0.611016	0.149406	-0.567662	1.82546	-0.43435	1.57965	0.0920074	-0.587302	-2.2273	-0.0706326	-0.116352	-0.0697537	-0.581445	-0.835569	0.0929488	0.888195	0.875265	0.526926	-0.544248	1.64828	0.834085	-1.05268	-0.252704	1.01918	3.19872	-1.27462	1.77793	1.53267	1.25671	2.13123	1.26555	-0.316671	1.37445	1.44267	-1.66993	-1.23417	-0.712396	-0.68079	2.62216	0.212318	1.61966	-1.05207	0.77794	1.01363	-0.0133995	-0.969061	-0.582994
Healthy	1.52584	-0.962789	-0.848571	-0.493781	-0.0809219	0.179213	-1.06639	-0.476325	-1.47647	-0.980062	-0.479933	-0.0400528	-0.965378	1.16967	0.788036	-0.762153	-0.540959	-0.402403	1.68921	0.492779	-1.3036	-1.18668	-0.797976	-1.29243	1.44086	-0.96258	0.281831	0.632809	-1.03027	-0.874539	-1.29227	-0.791162	-0.601483	-0.94577	-1.06484	-0.163037	0.493018	0.983889	0.636798	1.27348	-1.23219	1.09167	-0.0587751	0.0342614	1.20279	0.10555	-0.471292	0.616309	-1.00371
Mastitis	1.92546	-1.2736	-0.743391	-0.537713	-0.489214	-0.996554	-0.928905	0.476186	-1.93104	-1.16435	0.0274502	0.738966	-0.477297	0.876449	1.51117	-1.112	-0.391469	-0.7703	1.43603	0.869732	-0.79726	-1.10987	-0.30294	-1.00543	1.46837	-0.371242	0.60211	-0.252571	-0.755504	-1.27112	-0.50157	-0.58005	-0.401679	-1.59083	-2.02277	0.178324	0.703849	0.973824	0.667424	1.12483	-0.538799	0.919623	0.0498635	0.212333	1.1765	0.236021	-1.99506	0.418395	-0.792964
Healthy	0.561457	-1.2359	-0.971088	0.762883	1.64728	0.325303	-1.3281	-1.30183	0.0602586	-1.21643	0.102606	-1.02847	-2.06844	0.652878	0.660256	-0.862676	-0.17021	-0.406545	-1.03559	-1.65373	-1.16267	0.754627	-1.08563	-1.08241	0.553417	-0.724195	-0.183844	-1.03227	-0.321633	2.01915	0.0282593	0.384377	-1.21817	-0.153705	0.228644	-0.252642	-1.21455	-1.41122	-0.568013	0.742075	1.0205	1.36617	-0.208242	0.422137	0.313578	-0.603159	-0.248052	0.497108	0.675118
Mastitis	-0.324875	-0.240819	-0.196379	0.0137311	-1.21418	1.62051	-0.390287	0.894629	0.269157	-0.986231	-2.05522	-0.422859	0.169573	-0.0815823	-0.00129537	0.265612	0.524599	0.24579	0.719981	-0.375637	-0.803247	1.17178	0.992029	-1.04722	-0.476812	1.57659	1.53655	-1.42597	1.9041	1.53638	1.14069	1.96698	0.766837	-0.24584	1.23267	1.34937	-1.19433	-0.991178	1.02565	-0.618557	2.34478	0.894527	1.39816	-1.40736	0.289395	1.05247	1.01018	-1.13448	-0.437689
Healthy	1.90888	-0.706749	-0.61473	-0.615945	1.11701	-0.604399	-1.57545	-0.8826	-1.35321	-1.16375	-0.861341	0.189134	-0.991725	1.40728	1.21887	-1.06641	-0.176073	-0.429664	0.598075	-0.414121	-1.20875	-0.885574	-0.477953	-0.609976	1.40285	-0.516367	0.0589384	0.158194	-0.646863	-0.765754	-1.02449	0.0597434	-0.675677	-1.30503	-1.1058	0.0709157	-0.796643	0.937679	0.080237	1.29494	-0.103046	1.57898	0.311487	-1.19084	1.46305	-0.128372	0.291681	1.29507	-0.92087
Mastitis	1.86648	-0.738423	-0.70395	-0.695232	0.854067	-0.496968	-1.38458	-0.550023	-1.54604	-1.05669	-0.55183	0.488395	-0.854374	1.00438	1.24551	-1.00444	-0.294852	-0.442783	0.776561	-0.269761	-1.15625	-0.898132	-0.6931	-0.915834	1.42835	-0.553637	0.440201	0.290157	-1.04141	-0.954161	-1.04151	-0.135957	-0.605249	-1.17229	-0.81304	-0.00969881	0.147883	1.20357	0.146746	1.27865	-0.385894	1.42786	0.442397	-0.865964	1.68142	0.165265	0.205699	1.10096	-1.3319
Healthy	-0.190836	-0.28852	-0.642614	0.487534	2.94259	0.0989328	-1.01973	-1.85703	-0.139358	-1.3264	-0.0828058	-1.1078	-1.004	0.370636	0.0561813	-1.0909	-0.557348	-0.72125	-0.504086	-1.42062	-1.01988	0.77498	-1.39226	-1.63853	0.311989	-0.920317	0.0200157	-2.467	0.452488	1.86579	1.94214	0.810888	-1.26441	-0.621577	0.379102	-0.67065	-1.05905	-1.30703	-1.58719	-0.426616	1.15888	0.615519	1.06036	-0.525182	0.104596	-1.15726	-1.53864	0.128626	0.288571
Mastitis	-0.919407	-0.0319457	0.396341	0.680461	-0.912376	2.04411	-0.130091	-0.0729026	0.604223	-0.373334	-1.91524	-0.640797	0.304412	0.448117	-1.98118	0.32381	0.635193	1.21997	1.20297	-1.06364	-0.395432	1.55829	2.01292	-0.865517	-0.432985	2.0215	0.372497	0.6516	1.99297	1.44375	0.124794	1.00429	1.40931	0.161962	1.4235	1.03935	-1.7695	-0.94933	-0.707634	-0.319494	3.17843	0.240429	1.74738	-1.83893	0.558839	0.99376	-0.868846	-1.07736	0.296805
Healthy	1.79144	-0.820441	-0.826161	-0.526576	0.238548	0.110757	-1.38216	-0.550325	-2.01648	-1.11191	-0.593725	0.0530403	-1.09668	1.49366	0.985433	-0.417116	-0.389988	-0.427105	1.21893	0.145859	-1.14987	-1.16501	0.165294	-1.51598	1.4252	-0.963801	0.413086	0.494511	-1.09089	-1.08534	-1.14047	-0.936931	-0.95762	-1.40609	-1.80024	-0.222979	-0.333539	0.513921	0.426932	1.33094	-0.658444	0.76243	-0.558343	-0.976945	0.84807	-0.331836	-2.55897	1.65635	-1.4132
Mastitis	1.14509	-1.12377	-0.638501	-0.550725	0.353891	0.985039	-0.476075	0.696178	-1.79767	-0.967934	-0.49684	-0.0863498	-0.403942	0.876096	0.922408	-0.247949	-0.0909694	-1.04755	1.01332	1.48947	-0.910216	-1.17935	2.22385	-0.579278	1.28099	1.12121	0.967772	-0.651956	-0.641153	-1.21146	0.440581	-1.15463	-0.20683	-1.67348	-1.12718	0.521554	0.148505	0.782028	1.4633	0.971071	-0.424794	0.578945	-1.49289	-0.699605	2.18528	0.601891	0.0311324	0.390543	-1.45402
Healthy	-0.916142	-1.47833	-0.912454	0.267685	0.35325	0.912871	0.194953	-0.118578	0.706308	-1.14736	-0.949413	-0.52974	-1.42967	0.306363	1.22311	0.474448	-1.0345	-0.991979	-1.62418	-0.479998	-0.059343	0.814904	0.667757	0.0808656	0.128991	0.584503	0.360912	-1.38519	1.26983	2.08225	1.59412	1.59478	-0.775409	-0.967769	-0.165723	0.506686	-0.429591	-1.43782	0.837366	0.20462	1.07766	0.768901	-0.637201	0.632988	0.555923	0.128774	0.127855	-0.0254892	-0.0219501
Mastitis	-1.10437	-0.956617	0.116678	0.0995111	-1.31566	1.66777	0.538457	1.84166	0.852261	-0.485437	-1.47497	-1.08564	-0.213067	-0.260382	-0.163634	0.133706	-0.131528	0.786022	0.2247	0.641008	-0.408698	1.49458	2.29039	0.0732445	-0.716679	2.99664	2.68056	-0.411207	1.43893	1.73118	2.239	2.25137	1.4933	-0.060543	0.227465	1.90115	-0.604754	-1.14598	2.01748	-0.246789	1.59227	0.522581	0.375027	-0.15703	0.313648	1.72359	1.11942	-0.747359	-0.0678057
Healthy	1.35933	-1.57578	-0.672748	-1.10007	0.79782	1.00492	-0.0725353	0.200503	-1.25738	-1.03798	-0.310719	-1.04882	-0.512073	0.574394	1.17348	1.98057	-0.795905	-1.25832	-2.40153	0.90033	-0.754175	-0.481139	2.08381	0.292029	-0.474054	0.403078	1.10424	-2.30368	0.0787224	-1.23371	1.6429	0.126987	0.0694526	-0.832524	-0.337318	1.12787	0.743097	0.776549	-0.859337	-0.681345	0.180405	0.859521	-2.35393	1.59057	0.805791	0.784213	1.91354	0.0285211	-0.209497
Mastitis	0.816413	-0.762208	-1.00378	-1.04459	-0.804789	-0.433406	-0.733443	-0.266136	-0.953602	0.713883	-0.579194	-0.358358	-1.16074	0.580184	0.434369	1.66473	-0.72566	-1.1981	0.219667	0.112952	0.0784279	-1.00814	-1.07885	0.439367	1.13539	-0.514714	0.33695	-0.456835	-0.0941778	-1.2331	-0.0217846	-0.0883591	1.40464	-1.04984	-1.13413	1.49992	0.342943	1.2774	0.241901	0.53712	1.18306	0.994604	-1.00638	-0.389787	0.104877	1.08143	0.77986	0.489751	-0.839605
Healthy	-0.327503	-1.43985	-0.93533	0.201461	0.215029	1.09829	-0.584249	0.364086	-0.0466941	-1.21061	-0.710887	-0.848136	-1.13801	0.853475	0.989373	-0.577174	-0.129875	-0.916516	-0.145077	-0.322599	-1.04128	0.861875	-0.176385	-1.2267	-0.543041	0.230207	0.231891	-1.66538	0.16873	1.76844	1.82484	1.29659	-0.636651	-0.083976	0.323731	0.748985	-0.824049	-0.922669	0.451455	0.0796057	0.69538	0.898804	-1.42794	0.265358	-0.00119464	0.418525	0.556197	-0.0915065	-0.0826675
Mastitis	-1.12437	-0.380736	-0.156751	-0.296926	-1.25972	0.983403	-0.0528728	1.33742	0.686824	0.428256	-1.67524	0.811566	0.233957	-0.360969	0.0813754	0.116694	-0.192876	0.490177	1.09458	0.0940484	-0.859805	1.5123	2.03244	0.00699259	-0.68049	2.42083	2.80326	-0.495239	1.55647	1.49551	2.16474	1.58597	1.35356	-0.126956	-0.223889	1.92525	-0.642321	-0.800094	1.03053	-0.844427	0.658836	0.679192	0.412858	-1.29437	-0.212357	1.44862	0.824687	-0.791645	0.030761
Healthy	2.03501	-1.302	-0.673195	-0.225997	0.21399	-0.91581	-1.55724	-0.616352	-1.79103	-1.35581	-0.481597	-0.504957	-0.929069	1.4429	1.55939	-0.49264	-0.198731	-0.451909	1.03594	-0.747746	-1.21156	-0.924957	-0.691091	-1.39585	1.29215	-0.0821274	0.716489	-0.267277	-0.817905	-1.06339	-1.36388	-0.304416	-0.810076	-1.21842	-1.96773	0.0579419	-1.5402	0.300537	1.32968	1.23915	-0.687353	1.57199	-1.11246	-0.608325	0.0125024	0.167863	-1.11712	1.41407	-1.55645
Mastitis	1.04141	-1.06856	-0.747627	-0.305378	0.464232	-0.791346	-1.28497	-0.29978	-1.62831	-0.938629	-0.221849	-0.358511	-0.931206	1.03524	1.61309	-0.371095	-0.377762	-0.585643	0.675878	-0.330457	-1.27093	-0.975524	-0.027182	-1.04719	1.31141	-0.189811	0.902313	-0.917803	-0.81375	-0.87969	-0.516316	-0.100553	-0.337192	-1.43557	-1.58281	0.530454	-1.28535	0.977895	1.31497	1.24726	-0.652934	1.41508	-1.24237	-0.464618	0.509236	0.367574	0.121181	0.977477	-1.49875
Healthy	0.974156	-1.10463	-0.998836	0.872803	1.27907	-0.0465239	-1.06003	-0.16759	0.127869	-1.11792	-0.502998	-0.783758	-1.25744	1.311	0.82575	-0.765128	-0.68661	-0.328652	-1.50753	-0.997733	-0.952309	0.587037	-0.54843	-1.17255	0.663128	-0.488004	0.293825	-0.728485	-0.0590112	1.97556	0.763548	0.645785	-1.24391	-0.483372	-0.142334	-0.227122	-0.839078	-1.26038	-0.362464	0.29333	0.049053	1.2093	0.204658	1.1458	-0.440999	-0.435086	-2.21863	0.598987	0.166924
Mastitis	-0.447036	-0.487896	-0.11842	0.635489	0.137312	1.38015	0.0357608	1.49831	0.43178	0.103615	-1.94968	-0.161654	0.0680908	0.398259	-0.52739	-0.269456	0.130673	0.43026	0.645042	0.0164393	-0.509348	1.26886	2.42403	-0.131187	-0.364506	2.44351	0.946311	-0.262787	1.65603	1.59216	1.6197	1.37466	1.23662	0.454264	0.350307	1.52729	-0.960318	-0.830926	0.560633	-0.301259	2.07556	0.341157	1.27707	-1.03847	0.267738	1.04949	-0.234426	-0.379954	0.322673
Healthy	0.780177	-1.59481	-0.800944	-0.947352	0.763231	0.316465	-1.61145	-0.369562	-1.79588	-1.32173	-0.615937	0.462379	-0.817834	1.86801	2.12771	-0.76147	-0.138372	-0.814148	0.689033	-0.00231453	-0.937668	-1.14004	-0.904729	-1.49187	1.46927	-0.0876191	0.73666	-0.272333	-0.836057	-1.07243	-0.683556	-1.08795	-1.13473	-1.9347	-2.15388	-0.233241	-0.418596	0.485877	0.845992	1.09891	-1.2944	1.41611	-0.852366	-0.93579	0.189622	-0.616003	-1.12276	0.691505	-1.94178
Mastitis	0.66802	-0.64761	-0.650836	-0.547261	0.535506	-1.63855	-1.06882	-0.658343	-1.52312	-0.510312	-0.712017	0.388852	-0.787142	1.63587	1.62899	-1.14843	-0.692863	-0.543428	0.710373	0.732527	-1.13692	-0.988147	0.0211525	-0.839733	1.4424	0.0709867	0.99624	-0.775115	-0.492391	-0.912378	-0.828637	-0.084122	-0.193585	-1.71229	-1.19562	0.648967	-0.344648	1.03903	1.18017	1.24924	-0.491499	1.40134	-0.216498	-0.486798	0.94393	0.594374	0.73841	1.42224	-1.35055
Healthy	0.662036	-1.52972	-0.771017	0.254802	0.53421	-0.532849	-0.655078	0.789921	0.370908	-0.943512	-0.132963	-1.05759	-0.869707	0.760177	1.53836	-0.160592	-0.80932	-0.682061	-2.07827	-0.157242	-0.385286	0.84948	0.565645	-0.583711	0.13515	-0.412285	0.570397	-1.6824	-0.551391	1.78683	0.623034	0.788187	-0.484591	-0.663066	-1.10505	0.533102	0.201888	-1.20937	-0.262219	0.788869	-0.211218	1.00426	-2.65468	-0.537498	-0.462493	0.65911	-0.266614	-0.202631	-0.397651
Mastitis	-0.258636	-0.618216	-0.167402	-0.0849041	-1.59059	1.38523	-0.00891981	2.62099	1.04315	-0.172025	-1.67805	0.00213372	-0.430643	0.0335657	0.237617	-0.600613	0.168441	0.397352	0.531313	1.19654	-0.641858	1.44956	1.86423	-0.561373	-0.58776	1.01839	2.08698	-1.849	1.63702	1.61549	1.93745	1.55233	0.602049	-0.207782	0.76655	1.22217	-0.425289	-0.631256	0.936814	-0.649068	2.18818	0.397214	0.543162	-0.988278	0.531817	1.32318	0.320047	-0.975665	-0.469594
Healthy	0.660235	-1.88391	-1.09644	-0.789928	0.507246	0.290849	-0.427729	0.36199	-1.71451	-0.929954	-0.905223	-1.5509	-0.839681	0.860042	1.58333	-0.106132	-0.535875	-0.975073	-0.106361	0.429557	-0.923884	-0.758356	1.03384	-0.498688	0.46084	0.871677	0.301699	-0.961271	-0.178882	-1.0116	-0.330906	0.284743	0.259308	-0.776456	-1.0263	0.411429	0.576031	0.460976	1.41809	0.964972	-0.362951	0.7429	-1.85014	0.432269	1.14614	0.57198	1.02536	0.301114	-1.07254
Mastitis	1.31178	-0.268662	-0.371962	-1.2359	-3.35872	0.359098	0.329545	1.74653	-0.185823	1.05125	-1.79639	1.63224	-1.27836	-0.0644248	-0.76159	1.93409	-0.62139	-0.979514	-2.8382	0.771923	0.641777	-0.94353	-0.971892	0.467444	-1.05453	-0.522826	-0.336832	-0.0588627	0.429744	-0.968953	-0.281097	-0.0513372	1.91732	0.0113637	-0.00299611	1.81011	2.45605	1.50886	-0.741533	-0.737287	1.04557	-0.0906215	-2.82612	-0.0547242	-1.77631	1.32957	-1.2607	-3.00055	-0.489856
Healthy	0.472898	-0.977639	-0.660075	0.542456	0.290729	0.372735	-0.811184	-0.449759	0.646157	-0.979747	-1.25119	-1.49429	-1.18308	1.11206	-0.123612	-0.485125	-0.66905	0.356476	-0.980806	-1.51876	-1.04503	1.00902	-1.90772	-1.33818	0.19291	-0.82106	-0.1346	-0.283436	0.80162	2.14718	0.477224	0.724302	-0.904602	0.0602572	-0.0677154	-0.297974	-1.5083	-0.999144	0.305736	0.354382	0.722801	1.0175	0.559892	2.92864	0.176678	0.200362	-0.830278	-0.133357	0.744935
Mastitis	-0.555664	0.0631404	-0.082235	0.0168335	-0.935052	1.76445	-0.402542	1.697	0.381859	-0.680102	-2.43234	-0.371908	0.514531	-0.116622	-0.476997	0.839393	0.386294	0.0280154	0.927177	-0.297955	-0.670705	1.30924	-0.113461	-1.08925	-0.665623	0.718839	0.176872	-0.51955	1.97372	1.55934	1.98192	1.38519	0.371747	-0.193096	1.6134	0.886023	-1.53327	-0.886514	0.978485	-0.271156	2.29761	0.91393	1.31888	-1.64676	0.179966	0.963994	-0.0114328	-1.40574	-0.26782
Healthy	0.851671	-0.979495	-0.765109	-0.191519	0.259286	-0.207842	-1.17249	0.38554	-1.65722	-1.17198	-0.600262	-0.385883	-0.876859	2.06952	1.4543	-0.871795	-0.394242	-0.509518	1.24018	-0.0805088	-1.16294	-0.885104	-0.313753	-1.22615	1.39754	-0.854561	0.442422	0.606667	-0.485185	-0.522419	-1.03028	0.142321	-0.636037	-0.822469	-1.82045	0.281547	-0.484566	0.749822	0.713299	1.57008	-1.12306	1.56271	-1.00359	-1.04628	0.738386	0.151049	0.442472	1.91164	-0.904204
Mastitis	1.70409	-1.19371	-0.659595	-0.050562	0.153721	0.321954	-0.730304	0.57251	-1.93062	-0.948436	-0.630587	-0.555543	-0.597958	1.3467	1.30605	-0.294825	-0.469187	-0.589026	0.907606	0.814462	-0.851612	-0.996625	0.0605428	-0.897307	1.3842	0.775513	0.746865	-0.0630009	-0.292455	-1.03598	0.22939	-0.167486	-0.565176	-1.1183	-1.18237	0.525906	0.446709	1.08817	1.76949	1.36153	-0.760142	1.34243	-1.28364	-0.824295	1.67295	0.495629	0.523322	0.652934	-1.19659
Healthy	1.46873	-1.07261	-0.692567	-0.354182	1.15627	-0.132986	-0.966112	-0.381228	-1.90637	-1.11066	0.491029	-0.233496	-0.96422	1.07902	1.1735	-0.763782	-0.363965	-0.696141	1.20508	0.38608	-0.984453	-1.35804	-0.117143	-1.22666	1.48127	-0.240505	0.485329	0.736321	-0.861704	-1.26847	-0.477457	-0.41849	-0.746993	-1.71013	-1.30309	0.551197	0.0564386	0.4429	0.697014	1.01322	-1.06828	1.30857	-0.0986042	-0.458446	1.30922	-0.121044	-0.0192799	0.805915	-1.60248
Mastitis	1.52281	-0.907324	-0.678744	-0.348898	0.401137	0.343416	-0.96989	0.669562	-2.00174	-0.938575	-0.0678595	0.225936	-0.911805	1.03901	0.978502	-0.824514	-0.736713	-0.431961	0.972784	0.821795	-1.06295	-1.23929	0.114469	-1.23411	1.45896	0.0727359	0.650219	-0.16985	-0.887179	-1.11441	-0.720136	-1.08058	-0.409909	-1.76541	-0.754175	0.607738	0.32879	0.64703	0.119129	1.07686	-0.994183	1.39373	0.325901	-0.703444	1.15928	0.241735	-0.0407488	0.514256	-1.24057
Mastitis	-0.422899	-0.771019	-0.462047	0.463952	-1.00799	1.33643	-0.234735	1.58218	0.609354	-0.36459	-1.29172	0.547709	-0.878291	0.285077	-0.33373	-0.588538	0.289658	0.0169673	0.191597	0.44139	-0.506334	1.19844	0.0925503	-0.676042	-0.300317	-0.402788	2.24563	-1.2772	1.46386	1.72278	1.08791	1.16302	0.736953	-0.108503	0.220777	1.61376	-1.03881	-0.597006	0.76844	-0.405658	1.46191	0.436856	0.95137	-1.03394	0.0646804	1.0176	0.107124	-0.0254074	-0.378186
Healthy	0.620186	-1.53908	-0.772283	-1.03078	0.84113	0.11328	-0.185982	0.0341048	-1.28853	-1.00208	-0.356169	-1.07689	-0.692213	0.639948	1.52228	0.325648	-0.843505	-1.23129	-0.643735	0.918518	-0.941593	-0.7198	1.91231	0.00135652	0.676624	0.38682	1.25414	-1.36362	0.228258	-1.00391	0.498585	0.812797	0.334249	-0.821335	-1.13547	1.10777	0.354687	0.84422	0.769073	0.0517548	0.157474	0.79708	-1.72578	0.731731	0.418739	0.755985	1.47799	0.788228	-0.670033
Mastitis	0.970544	-1.33604	-0.825192	-0.954618	-0.127555	-0.293928	-1.01332	-0.139018	-1.52853	-1.19302	0.257968	0.699614	-0.741545	0.917776	1.41119	-0.00334312	-0.22394	-0.851172	0.215417	0.81988	-1.20294	-0.920899	-0.779231	-1.17137	1.15226	-0.128216	1.03122	-0.972873	-0.386169	-0.79014	-0.350087	0.188163	-0.0030703	-1.20364	-1.65681	1.03952	-0.415515	0.9986	1.08894	0.661206	-0.917642	1.20984	-0.821362	-1.38906	0.280781	0.389806	0.981535	0.570063	-1.19132
Healthy	0.660583	-1.40008	-0.631329	0.725108	1.17337	0.255176	-1.41366	-0.922489	-0.011921	-1.09766	0.191416	-1.48712	-1.19207	1.0221	0.961643	-0.521304	-0.725788	-0.566571	-0.280397	-1.2964	-0.998026	0.899709	-1.85873	-1.49059	0.800526	-0.627284	0.0696443	-0.417905	-1.12309	2.01807	-0.689994	0.328956	-1.42768	-0.626393	-0.385799	-0.395086	-1.18288	-1.38575	0.130465	0.475851	-0.438526	0.839761	-0.710357	0.156839	0.207559	-0.521945	-1.11188	0.752111	-0.324862
Mastitis	-0.931186	-0.207927	0.315273	0.23829	-0.529847	1.23742	-0.595703	0.771243	-0.00989964	-0.815361	-1.30397	-0.51423	0.334762	0.679009	-0.833274	-0.0440099	-0.105465	0.572816	0.923844	-0.120518	-0.693607	1.4493	-0.283491	-1.13751	-0.00796072	-0.991158	2.49429	-0.907966	0.906883	1.54272	0.604034	1.23769	1.01566	-0.130319	1.27547	0.843318	-1.20636	-0.959471	0.0927857	-0.682997	1.75961	0.0547796	1.212	-1.44485	0.465	0.716349	-0.804163	-0.783067	-0.482867
Healthy	1.51776	-1.33207	-0.98086	-0.724584	0.822592	-0.146247	-0.801952	-0.287221	-1.46068	-0.857157	0.497286	0.170327	-1.12474	0.901807	0.455735	-0.566449	-0.394786	-0.681257	0.467133	-0.645991	-0.603385	-1.3035	0.125425	-0.621225	1.37865	0.511783	0.376492	0.351897	-0.823038	-0.390357	-0.30055	0.341522	-0.567629	-0.418361	-1.64804	0.330502	0.0611667	0.863166	-1.17529	1.32905	-1.2539	0.985201	-0.250292	0.166202	0.736997	0.0421586	0.810811	1.30588	-1.01573
Mastitis	2.01458	-1.35152	-0.815367	-0.567751	0.150416	-0.208987	-0.796635	-0.628341	-1.93132	-0.98793	0.340269	0.155518	-0.7941	1.30357	1.50753	-0.577097	-0.724107	-0.652563	0.765698	0.0295078	-1.0662	-1.27657	-0.241755	-0.918271	1.36011	-0.678948	0.600706	-0.0372047	-1.01562	-1.17854	-0.998769	-0.95182	-0.345538	-1.68872	-0.843664	0.0429668	-0.19712	0.873333	0.394772	1.23972	-0.748247	1.14985	-0.309888	-0.97056	0.696313	0.0805011	-0.943949	0.538554	-1.63228
Healthy	0.426169	-1.23886	-0.707445	0.446061	1.15414	-0.306807	-1.10002	0.520207	0.121276	-1.00676	-0.0463695	-1.30149	-1.22634	1.02895	0.816846	-0.413385	-0.631125	-0.595628	-0.98567	-1.4423	-1.14197	0.813393	-1.12671	-1.57463	0.14572	-0.641768	0.472386	-1.35588	0.25797	2.20183	0.587432	0.947815	-1.10056	-0.617303	-0.396202	-0.414662	-1.39472	-0.874637	-0.249118	0.143282	1.66407	1.21763	0.641725	2.26334	-0.425483	0.564679	-0.834815	0.495143	0.0090545
Mastitis	-0.566646	-0.859439	-0.360141	0.0528249	-1.29159	2.25779	-0.245781	0.308019	1.1069	0.0886582	-1.37809	-0.228024	0.124249	0.0829949	0.288836	0.276312	0.717776	-0.109238	0.619878	-0.443695	-1.01156	1.08673	1.02891	-1.06773	-0.741504	1.68531	0.211492	-0.00136069	1.80888	1.61759	0.835701	1.16721	0.323406	-0.614068	1.35656	1.04845	-1.39176	-0.862927	1.01894	-0.248252	2.97532	1.02671	1.40881	-0.53569	0.42504	1.1621	-0.50841	-0.45627	-0.262933
Healthy	1.59882	-1.25766	-1.00856	-0.372945	0.483425	0.826562	-0.831105	1.47999	-1.51828	-0.770608	-1.00561	-0.666574	-0.672574	1.09346	1.61375	-0.847349	-0.578957	-0.945976	0.247168	0.422639	-0.992623	-0.904005	0.86804	-1.04929	1.0722	0.26107	1.02044	-1.05475	-0.203378	-1.09053	1.24041	-0.174786	-0.163793	-1.01952	-1.15187	0.775197	0.117396	0.599955	1.04707	1.06316	-0.473234	1.18294	-1.53117	0.574779	1.25051	0.906164	0.91322	0.480272	-1.03665
Mastitis	1.14888	-0.804607	-0.793225	-0.208827	0.280577	-0.116477	-1.14351	0.549121	-1.50975	-0.990748	-0.227905	0.0221574	-0.829641	1.61936	1.25822	-0.908581	-0.344931	-0.632403	0.670549	-0.0868972	-1.07402	-1.03001	-0.31469	-1.04363	1.44841	-0.301922	0.796209	-0.537112	-0.720272	-1.04447	-0.44738	-0.0852908	-0.547565	-1.16105	-1.05645	0.520031	-0.466841	0.705863	0.383792	1.27222	-0.70957	1.53422	-0.5872	0.887875	0.826454	0.325168	0.832535	1.38291	-1.49875
Healthy	0.967397	-1.46338	-0.778061	-0.500726	1.21607	-0.659877	-1.19791	0.279736	-1.33505	-0.861746	0.527607	0.0652782	-0.701589	0.353571	1.65319	-0.147396	-0.609115	-0.88471	-0.19304	-0.504856	-1.15049	-0.866444	-0.874215	-0.717767	0.881889	-0.935798	0.569083	-1.31751	-0.58464	-0.77652	-0.371064	0.113598	-0.65774	-1.53182	-1.39252	0.405623	0.188139	1.44183	1.39625	0.361723	-0.0878631	1.17616	-1.51441	-1.2407	-0.0932127	0.586035	0.910883	0.820609	-1.64027
Mastitis	1.15964	-0.930018	-0.665067	-0.85945	-0.564383	-0.695428	-0.974653	0.31928	-1.06631	0.330985	-1.04212	1.1325	-0.502056	0.647898	1.56705	-0.209493	-0.834536	-0.848594	-0.193155	-0.111349	-0.197571	-0.88037	-0.747613	-0.606134	1.02247	-0.762372	0.369193	-1.20653	-0.427743	-1.12439	0.335616	-0.0834394	0.454093	-1.09391	-1.49787	0.83071	0.829416	1.55467	1.31131	0.905701	0.504617	1.17952	-1.40447	-1.48915	0.0229744	1.25626	0.366369	0.598522	-1.36465
Healthy	-0.47081	1.01851	0.751114	-0.511766	-0.0147167	-0.878427	1.28315	-1.05872	1.50116	0.661901	1.40621	-0.106191	0.72232	-0.642751	-0.900554	0.675325	0.564465	-2.48213	-0.698842	-1.7662	1.0466	-0.757662	-0.661476	1.19602	-0.964756	-0.618805	-0.692614	-0.0997241	0.610332	0.953319	-0.878271	-1.08787	1.11687	1.02867	0.743887	-1.09991	0.901948	-1.25833	-1.19169	-1.5301	0.079062	-1.21787	0.62035	0.36887	-1.17401	0.826633	-2.58061	-0.6323	0.863292
Healthy	-0.215365	1.31492	0.633705	-1.33583	-0.0649016	-0.898515	1.02247	-1.04573	1.10235	0.907007	1.71474	0.0648117	-0.124122	-0.705764	-0.680178	1.29143	-0.188981	-2.66021	-1.2317	-1.20237	1.10437	-0.904077	0.597756	1.19847	-0.963351	-0.740759	-1.12395	-0.582555	0.0618138	0.785889	-1.18547	-1.00894	0.777921	1.04757	0.107288	0.093261	0.622586	-1.28597	0.461079	-1.30895	0.127903	-1.16103	0.0356848	1.63379	-1.71622	1.57124	-1.22511	-0.967171	1.04124
Healthy	-0.888878	1.05596	0.754534	-0.739063	-0.760751	-1.35255	1.23489	-0.831862	1.31245	1.32305	0.945761	-0.183842	0.922767	-0.98584	-0.812156	0.4889	-0.0220932	-2.4714	-0.835543	-1.60127	1.01299	-0.737621	0.0447557	1.14188	-1.03588	-0.625987	-0.986882	-0.257665	0.824734	0.808968	-0.898718	-1.2423	0.0680048	0.834575	0.907675	-0.867175	1.85405	-1.29088	-0.717063	-1.12771	-0.0428545	-1.37733	0.598662	0.507309	-1.18495	1.10441	-1.56896	-1.25527	0.925557
Healthy	-1.26244	1.01878	0.412792	-0.969911	0.0308535	-1.39085	0.889258	-0.704015	-0.589742	1.08216	1.18131	-1.3688	0.330404	-1.08293	-0.0281723	0.618087	1.38538	0.554075	-1.54885	-1.32102	0.98954	0.753605	-0.116732	1.17485	-0.99348	-0.234187	-0.876432	-1.29696	0.0674914	0.987555	-0.916765	-0.466642	0.692944	1.17291	0.132724	-1.68673	0.0508537	-1.08533	0.225309	-1.22433	-0.891441	-1.02213	0.71606	0.649697	-1.62357	-1.78355	-0.933075	1.28331	1.21306
Healthy	-1.56407	1.96869	1.7203	-1.17015	-2.02397	-1.01634	1.23553	-2.14426	0.138029	0.997447	-0.0323905	3.65915	2.10392	-0.763091	-1.15191	0.58719	1.70574	1.60734	-0.591778	-2.11831	1.9094	1.88545	0.100797	1.12433	-1.01608	-0.246534	-0.473123	-0.772568	0.235707	-0.193658	1.20655	0.818822	1.48371	0.563504	-0.38023	-1.12146	2.49012	-0.512669	-0.756091	-1.30027	-0.923151	-1.57712	0.323525	1.95375	-1.50451	-0.862233	-0.395748	0.330741	0.27669
Healthy	-1.15967	1.0099	0.555076	-0.225966	-0.328539	-1.55585	1.18871	-1.72009	-0.186715	1.03241	0.593943	-1.29426	0.687534	-1.57696	-0.393402	0.756046	2.02503	0.975002	-0.719402	-2.4747	1.09904	0.796002	-0.490651	1.25276	-1.04449	-0.519994	-0.712227	-0.29075	0.55962	0.858601	-1.0573	-0.391507	1.09147	0.894608	-0.105474	-1.9843	1.07095	-1.04911	-0.837289	-1.48152	-0.398503	-0.995014	0.818494	0.537858	-1.39876	-1.50391	-2.69894	-0.297675	1.06732
Healthy	-0.479593	1.51361	0.382008	-1.28228	0.10615	-1.50869	0.825333	-0.844467	-0.416363	1.07804	1.83996	-0.988986	-0.1003	-1.18945	-0.360091	1.12531	1.0828	0.665279	-1.69476	-0.989046	0.878465	0.640384	0.693756	1.21163	-0.94261	-0.297819	-1.27111	-1.02405	-0.298301	0.834833	-1.1824	0.272672	0.765209	1.09066	-0.515752	-0.457854	0.934928	-0.951327	0.631091	-1.30055	-0.31968	-0.940787	0.0242306	1.73158	-2.21018	-0.686845	-0.500373	-0.391679	1.42825
Healthy	-1.20607	0.947929	0.720642	-0.540402	-0.00753287	-1.50875	1.19428	-1.30529	-0.0398144	0.845286	1.10061	-0.442959	0.667918	-0.975154	-0.932802	0.685045	2.04553	0.84261	-0.648435	-2.00434	1.08319	-0.847228	-0.534614	1.26442	-0.943863	-0.487327	-1.01547	0.283164	0.312122	0.28884	-1.48116	-0.895942	1.064	1.23586	0.491618	-1.23932	0.475713	-1.01724	-1.14703	-1.26473	-0.137482	-1.03884	0.642996	0.472072	-1.42158	0.465568	-1.19833	0.326838	0.962724
Healthy	-1.50601	1.09356	0.480489	-1.09068	-0.482741	-1.24481	1.03525	-0.861794	-0.185901	1.89668	0.586225	0.0819493	0.905332	-0.784217	-0.677353	0.498593	1.55399	1.05109	-0.627594	-0.960994	1.03234	-0.757923	-0.0399332	1.24197	-0.954516	-0.555933	-1.19249	0.249209	0.364915	0.242063	-1.03963	-0.980548	0.709945	1.12788	0.446161	-1.06289	0.164308	-1.03057	0.344478	-1.41417	-0.0934515	-1.1674	1.00863	1.09163	-1.37014	0.980213	-0.292064	-0.841754	1.19655
Healthy	-0.532158	1.49493	1.35032	-1.16949	-0.24802	-0.716902	1.1407	-1.76628	-0.330483	1.27909	1.38696	2.79929	0.463241	-0.84784	-0.747902	-0.0549314	1.31664	1.22323	-0.0863042	-0.09752	1.59768	-0.912472	0.618586	1.17945	-1.00114	-0.801503	-1.01656	0.377636	-0.254143	0.123138	1.3585	-0.312266	0.755674	1.18963	-0.0617604	-0.267217	1.11343	-0.278826	1.81203	-1.37734	-0.471107	-1.3369	0.100156	1.5177	-1.38463	1.47392	-0.344421	-1.1168	1.12322
Mastitis	-0.919096	0.928198	0.491568	-0.458891	0.0813734	-1.22818	1.12411	-1.18336	1.44886	0.77117	1.12406	-0.233566	0.786986	-0.95948	-0.505365	1.30683	0.450017	-2.48983	-0.651789	-1.91268	1.03147	-0.825782	-0.556347	1.20045	-0.934581	-1.00131	-0.849361	0.0832233	0.78902	0.775688	-1.01616	-0.959134	0.773705	1.2885	0.62455	-0.960958	0.625869	-1.34974	-1.26964	-1.28327	0.17762	-1.70654	0.516737	0.759638	-1.10341	0.751304	-0.77254	-0.11942	1.43313
Mastitis	-1.21666	1.13619	0.690912	-1.0719	-0.250144	-1.41049	1.03224	-0.214959	1.3943	1.35025	1.26144	0.107388	0.987712	-0.8387	-0.535956	0.751484	-0.0751299	-2.59879	-1.02384	-1.08943	1.11943	-0.794098	-0.235625	1.17045	-0.954266	-0.701589	-1.40483	-0.345704	0.35588	0.846341	-1.151	-1.49441	0.419056	1.23119	0.032627	-0.608622	0.0458684	-1.46939	-0.558976	-1.31598	-0.0470062	-1.25826	0.7204	0.461462	-0.993303	0.936506	-1.46755	-0.872875	0.957011
Mastitis	-0.213734	1.44659	0.671665	-1.52285	0.103993	-1.23655	0.878049	-0.892573	1.06613	0.938605	1.95953	0.0549573	-0.101141	-0.880417	-0.460481	1.72146	-0.410191	-2.46306	-1.18586	-1.30793	1.09995	-0.806071	0.394059	1.13916	-1.02172	-0.604867	-1.17985	-0.453042	0.10639	0.720807	-1.29754	-0.727939	0.470979	1.39288	0.0533137	0.496549	0.540898	-1.48329	-0.289778	-1.51065	0.170836	-1.40036	-0.0661854	1.58907	-1.69922	1.83329	-0.502994	-0.578817	1.48242
Mastitis	-1.25105	0.952287	1.01451	-0.419568	0.223245	-0.999624	1.23052	-0.427942	1.05997	0.850096	1.19803	-0.318527	0.598222	-0.494093	-0.708826	0.862968	0.187569	-2.59941	-0.399211	-0.710008	0.984224	-0.875736	-0.749196	1.19484	-0.959073	-0.346806	-0.968564	0.266313	0.423985	0.65129	-1.46219	-0.626086	0.248436	1.20063	0.392526	-1.73009	1.55016	-1.27991	0.784359	-1.28914	-0.0143756	-1.71042	0.27421	-0.131602	-0.523485	0.62198	-0.279916	-0.565794	1.3154
Mastitis	-1.74838	1.03683	0.66788	-0.864206	-0.553121	-0.737235	1.20135	-0.496988	1.06216	1.29688	1.08529	-0.194315	0.856179	-1.04049	-1.00193	1.11323	-0.0192528	-2.30418	-1.04787	-1.59257	1.13674	-0.828928	0.0415105	1.14885	-0.951187	-0.776866	-0.952886	0.344596	0.65183	0.88657	-1.3252	-0.668357	0.237291	1.45416	0.623874	-0.643569	1.33006	-1.42505	-1.51106	-1.32739	0.218429	-1.58334	0.522459	0.495386	-0.920723	0.76714	-0.925978	-0.996268	1.46287
Mastitis	0.269454	1.11891	0.974869	0.222855	0.209946	-0.73531	1.19805	-0.889975	-0.140122	1.67503	1.1303	-0.894137	0.871946	-1.41764	-0.744145	1.65035	2.17564	0.961094	0.222381	-0.605945	0.930441	0.762311	0.131728	1.26398	-0.990299	1.11275	-1.24212	-0.427889	0.741934	0.785292	-0.802003	-0.292945	1.40786	1.20129	0.170681	-1.6273	1.98131	-1.00512	0.683381	-1.44217	-0.537868	-1.50302	0.54713	0.1874	-1.25579	-1.55892	-0.514036	-0.131291	1.36928
Mastitis	-0.950847	1.64374	1.71179	-0.613857	-0.211645	-0.171929	1.20078	-1.08113	-0.321574	1.74316	0.377109	3.22148	1.75483	-1.31186	-0.746379	0.791734	1.8381	1.24392	0.447335	1.0998	1.53437	1.08096	0.134505	1.17661	-0.912929	1.43835	-1.01833	-1.12268	0.387014	0.357939	1.36503	0.24532	1.38867	0.936841	-0.141731	-1.07303	2.18046	-0.648258	1.68488	-1.44818	-1.41115	-1.92444	0.313193	0.793068	-0.796167	-1.14718	0.849184	-0.0639566	1.22049
Mastitis	-0.126816	1.59916	1.18284	-1.32256	-0.2279	-0.916862	0.91732	-0.51081	-0.687047	1.49552	1.51668	-0.289752	0.43207	-1.32291	-0.826982	2.11179	1.68883	0.835285	-0.0898523	0.761005	0.972222	0.770226	0.553087	1.1253	-0.950681	-0.164082	-1.39321	-0.623408	0.20418	0.628196	-0.877623	-0.093335	0.874478	1.35116	-0.35543	0.111965	1.58191	-0.691583	1.99002	-1.42714	-0.697928	-1.75179	-0.252582	1.99936	-1.12082	-0.655563	0.409933	-1.25518	1.69258
Mastitis	-1.64106	1.89948	1.71738	-1.06584	-1.62541	-1.44565	1.22103	-2.01541	-0.0221562	1.36548	-0.281422	3.51106	2.15401	-1.11471	-0.935737	1.47007	1.57285	1.5665	0.0977247	-1.13994	1.87703	1.80756	0.115836	1.09402	-0.985383	-0.414241	-0.861231	-0.920491	0.411702	-0.212718	1.20728	0.824415	1.41076	0.698916	-0.0560346	-1.16197	2.61236	-0.207432	-0.166536	-1.38943	-1.13222	-1.79433	0.256211	1.43671	-1.2537	-0.912853	2.31226	0.249537	0.773922
Mastitis	-0.574176	1.02591	0.830628	-0.166853	0.310357	-0.942979	1.25261	-0.799659	-0.114986	1.39482	1.41992	-0.342643	0.746496	-0.958456	-0.583538	1.74708	2.36341	1.12885	-0.379691	-1.80139	1.02045	-0.477875	0.260654	1.23875	-1.06571	-0.311755	-0.95181	0.640061	1.00657	0.418099	-0.7392	-0.945966	0.527844	1.58644	0.585397	-0.920791	1.14931	-0.829683	-0.601572	-1.35792	-0.0343237	-1.78122	0.760736	0.804441	-0.944934	1.15837	-3.47257	-0.609448	1.01072
Mastitis	-1.2893	1.15882	0.648081	-1.09157	-0.596134	-0.00135198	1.12199	-0.677227	-0.230377	1.87563	-0.0272472	1.70256	1.36388	-0.96668	-0.832889	0.805444	1.69185	1.12379	-0.299066	-0.946426	1.13372	-0.750833	0.339468	1.31836	-0.957833	-0.291067	-0.947276	0.84856	0.536204	0.11079	0.300704	-0.374838	0.198412	1.21774	-0.263918	-0.695728	0.349133	-0.701274	0.463186	-1.47771	-0.39033	-2.18042	0.757288	1.09513	-0.696643	1.34258	0.177807	-1.04895	1.29263
Mastitis	-0.313364	1.43762	0.34565	-1.29971	0.217163	-0.834115	0.936039	-0.899617	-0.630989	1.27358	2.38208	-0.390721	-0.207008	-0.816816	-0.442889	1.66207	1.40066	0.830918	-0.624239	-1.11864	0.795288	-0.859956	1.32567	1.24088	-1.00112	-0.550932	-0.892	0.561277	0.153733	0.200617	-0.949062	-1.16141	0.182354	1.37285	0.177112	0.0719835	0.856953	-0.771003	0.687754	-1.51047	0.0884428	-1.78733	-0.0238051	1.82399	-2.14261	1.79449	-0.128286	-1.25011	1.09786
Mastitis	-1.25221	0.932103	0.883124	-0.589409	-0.0998152	-0.631637	1.2675	-0.560125	-0.602892	1.3114	1.34681	-0.343273	0.206188	-0.301765	-0.72351	1.05074	2.21407	0.832086	-0.465006	-0.872369	0.793512	-0.767419	-0.0547526	1.38218	-0.892444	-0.150694	-0.772088	0.57841	0.441004	0.12909	-1.0675	-0.731192	0.327517	1.38191	0.160231	-1.45338	1.75263	-0.878341	0.858638	-1.35032	-0.238098	-1.48604	0.104318	-0.118028	-0.782519	0.922629	-0.22012	-0.744471	0.98478
Mastitis	-1.5455	1.02459	0.495277	-0.976647	-1.0054	-0.958444	1.35664	-0.762105	-0.0654252	2.07275	0.407892	0.700444	0.891856	-1.03582	-1.11903	1.45104	1.88657	1.27354	-0.225202	-1.39066	1.01321	-0.481761	0.940883	1.2872	-0.991103	-0.347446	-1.17237	0.676784	0.849695	0.270309	-1.0409	-0.585794	0.175414	1.3722	0.160524	-0.627927	1.92408	-0.661236	-1.10464	-1.50302	-0.352898	-1.74138	0.757618	0.367139	-1.0088	1.38433	0.870774	-1.9854	1.56253
Healthy	-0.54857	0.81623	1.10455	-0.552509	-0.245409	-1.34005	1.00145	-0.330573	-1.19058	0.023392	0.804963	-0.488201	0.829471	-0.515225	-0.202802	0.818287	-0.509305	0.402002	-1.25239	0.630049	1.08966	-1.054	-0.477459	0.808781	-1.0484	0.63227	-0.642791	-0.334594	-0.0523538	0.101263	-0.163452	0.161969	-0.416318	0.663935	0.804468	-1.2252	-0.899213	-0.332474	-0.794546	-0.298	-0.543484	-0.373857	0.264771	1.72699	-1.03915	-0.458611	0.074276	0.66672	0.829215
Mastitis	-0.528735	0.756513	1.29991	-0.506629	-0.15185	-0.884368	1.12524	-0.287062	0.658022	0.51553	0.964579	-0.523756	1.73575	-0.0307709	0.122835	1.10595	-0.753908	0.641785	-0.884831	0.812041	1.09334	0.90544	-0.0222817	0.907486	-1.09057	0.410094	-0.196106	-0.629253	0.215753	-0.0476739	1.19622	0.703282	-0.228212	0.192136	0.620245	-1.4522	-0.609904	-0.195289	-0.537153	-0.437534	-0.694341	-0.640443	0.419541	0.877322	-0.808757	-0.380524	-0.222813	-2.17791	0.200455
Mastitis	-1.06045	1.1749	2.2817	-0.218518	-0.510715	-0.908816	1.2617	-0.169885	-0.918098	1.8417	0.731195	-0.548416	1.56289	-0.579758	-0.48111	2.04975	1.82582	1.69289	-0.643036	0.659156	1.06251	1.06262	0.360159	1.14572	-0.956948	1.08442	-0.483742	0.695531	1.2944	-0.118109	1.44145	0.444721	0.600579	0.612794	1.59217	-1.23863	-0.012271	-0.00866475	-0.935766	-0.359685	-0.54272	-0.695163	0.762617	0.743525	-0.963283	0.459905	0.39559	-0.999764	0.30638
Mastitis	-1.05952	0.704624	2.2391	-0.132876	-0.0555029	-0.507675	1.1837	-0.444438	-0.906376	0.950405	0.443834	1.70159	0.941535	-0.266693	-0.270976	1.14367	-0.545503	1.00443	-0.352642	0.946852	1.62341	-1.44974	0.265752	1.13167	-0.979831	2.3866	-0.552259	0.336577	0.506997	-0.181078	1.44066	0.684084	0.0854666	0.355227	1.169	-1.04899	0.433164	0.0857584	-0.913857	-0.478057	-0.426028	-0.743845	0.699592	0.411698	-1.38308	-0.664331	0.710717	0.165387	1.03165
Mastitis	-0.411423	1.00934	1.7561	-0.227559	0.563711	-0.831612	1.19126	-0.608898	0.418055	0.525953	1.04235	1.58399	1.2254	-0.534059	-0.0242711	0.952474	1.68856	0.494267	0.0221414	1.82504	1.51135	-1.25205	-0.502825	1.09143	-1.01412	3.07245	-0.281481	-0.57407	-0.147438	-0.288803	0.954763	0.318809	-0.0727074	0.149225	0.199773	-1.12774	2.22103	0.0664495	-1.15652	-0.648963	-0.43379	-0.019151	-0.0560816	0.13406	-0.909562	-0.348055	0.79182	0.27138	0.436269
Healthy	-0.604459	0.853871	1.2189	-0.778491	-0.285904	-1.086	1.11625	-0.781574	0.665354	0.0980746	0.863684	-1.21807	1.00133	-0.777493	-0.761301	0.671763	2.36527	0.68126	-1.0926	-0.0376648	1.23993	-1.0714	-0.350129	1.09153	-0.982321	0.270322	-0.387446	-0.153706	0.264957	0.141698	-0.39799	0.103986	-0.00335002	0.68958	0.499489	-1.30182	-0.0709294	-0.635332	-1.48176	-0.818085	-0.197613	0.171945	0.757372	1.28773	-0.635035	-0.411487	0.331345	0.361116	0.403902
Mastitis	-0.446812	0.809398	1.26282	-0.70696	-0.312179	-0.669197	1.25222	-0.703194	0.568894	0.430201	1.29715	-1.72482	1.76532	0.0800659	-0.565154	0.893113	-0.202342	0.816611	-1.14647	0.080258	1.26038	0.969483	-0.273783	1.15224	-1.03137	0.173798	0.0179081	-0.193597	0.37603	0.0706303	0.785829	0.116639	-0.163121	0.812366	0.380047	-1.5323	-0.320572	-0.394812	-1.04825	-0.657265	-0.364008	-0.629755	0.8488	0.842625	-0.749453	-0.25896	0.241924	-2.54442	0.109306
Mastitis	-0.791229	1.29195	1.93041	-0.212249	-0.205706	-0.764991	1.36567	-0.58821	-0.86011	1.86129	0.945296	-1.14659	1.81638	-0.819603	-0.738487	2.02135	2.28557	1.58027	-0.664564	0.309934	1.1988	1.11505	0.496257	1.24055	-0.915047	0.559769	-0.173764	0.774587	1.26115	-0.115895	1.35507	-0.0317279	0.669956	0.329137	1.64327	-1.26251	0.0776708	-0.237746	-1.07546	-0.974107	0.143446	-0.890973	1.05155	0.42654	-0.482759	0.616535	1.23793	-1.07118	-0.120547
Mastitis	-0.928978	0.694963	2.24504	-0.421842	-0.615175	-0.474431	1.21545	-0.622364	-0.635485	1.0487	0.586851	0.116478	1.37497	-0.898393	-0.88827	1.20054	-0.117922	1.1913	-0.631808	0.279247	1.50799	-1.38981	0.469532	1.18016	-1.00652	1.30494	-0.45245	0.531833	0.65223	-0.329455	0.721447	0.500876	0.110295	0.518038	1.2364	-1.72552	0.275059	-0.259194	-0.517819	-0.830676	-0.0517733	-0.604474	1.09975	0.592614	-0.606505	-0.221754	0.282934	0.0612301	0.954147
Mastitis	-0.415888	0.93743	1.69289	-0.23695	-0.1903	-1.08117	1.26604	-0.444662	0.533758	0.912618	0.941778	-0.0593668	1.62986	-0.775342	-0.841776	1.15123	2.31969	0.895751	-0.37597	0.979533	1.48234	-1.0774	0.21983	1.2601	-0.989195	1.69095	-0.24749	-0.0902239	0.325964	-0.276824	0.477157	0.280715	-0.0179129	0.30613	0.440565	-1.3893	0.466707	-0.372141	-0.970471	-0.97701	-0.0605213	-0.105322	0.763724	0.429696	-0.512863	-0.455231	0.347307	-0.312187	0.559641
Healthy	-1.57573	1.1106	1.15958	-0.675663	-1.37083	-0.904865	1.06767	-0.126483	0.621066	0.479735	0.470136	-0.126227	1.04427	-0.682069	-1.14393	1.10788	2.04568	0.843599	-1.60334	-0.925512	1.12089	-1.33894	-0.312609	1.09217	-0.901677	-0.244972	-0.287254	0.306718	0.411556	0.0360474	-0.792916	-0.538567	0.624804	0.562581	0.5561	0.11678	-0.582901	0.0367751	-1.03787	-0.929308	0.100406	0.0422231	0.527551	0.429564	-1.27206	-0.0654611	-1.13995	-1.23257	-0.0338518
Mastitis	-1.08015	1.07628	1.36888	-0.853287	-1.6781	-0.436233	1.15218	-0.0938332	0.491219	1.12917	0.450726	-0.0100015	1.5282	0.107046	-0.996432	0.766314	-0.855234	0.97291	-1.52188	-0.84011	1.11773	0.995019	0.0331746	1.17045	-1.05851	-0.587278	-0.0030543	0.260394	0.632865	0.066728	0.0651022	-0.127886	0.470956	0.388586	0.665606	0.121974	-0.7936	0.200555	-0.80703	-0.859302	0.129595	-1.02262	0.611839	0.0202519	-1.90522	-0.0862228	-0.858346	-3.30346	-0.245338
Mastitis	-0.949574	1.30177	1.67443	-0.594577	-1.87292	-1.11194	1.13993	-0.223646	-1.08765	1.76238	0.305292	0.340224	1.32582	-1.04232	-1.33563	1.3169	2.2218	1.43996	-1.10187	-0.438256	1.00305	1.06589	0.299372	1.12906	-1.00633	0.215076	-0.479965	0.651909	0.946609	-0.28693	0.526198	-0.51165	0.911935	-0.0342597	1.10973	0.303918	-0.0177225	-0.0425866	-1.45014	-0.93679	0.569256	-1.04066	0.760686	-0.295698	-1.06113	0.534588	-0.0335492	-1.92518	0.206891
Mastitis	-1.64139	1.13215	1.45153	-0.409837	-1.76041	-0.909113	1.16267	-0.109109	-1.23656	1.30201	-0.156901	0.258899	0.985214	-1.11604	-1.10312	1.60467	-0.469836	1.28945	-0.975104	-0.560574	1.143	-1.10738	0.0200821	1.15092	-1.01386	0.27434	-0.380784	0.585102	1.01009	-0.359157	-0.222504	-0.764034	0.810225	-0.600046	0.905218	0.434984	-0.153683	0.22849	-1.50238	-1.03698	0.4158	-1.18512	0.795057	0.257452	-1.52385	0.146059	0.263625	-1.29175	-0.262181
Mastitis	-1.28659	1.26299	1.32751	-0.311433	-1.61512	-1.13915	1.10273	0.110095	0.497866	1.07812	-0.337669	0.431332	1.13315	-1.01533	-1.31981	1.33476	2.21921	0.94723	-1.04568	-0.558307	1.1626	-1.41639	-0.346768	1.12583	-0.955916	-0.143639	-0.561678	0.428842	0.752612	-0.369761	-0.865762	-0.999787	0.734428	-1.24634	1.18732	0.942126	-0.124651	0.359547	-2.24179	-1.03987	0.555317	0.214585	0.665347	0.15692	-1.09306	0.205127	0.375382	-1.44076	-0.113872
Mastitis	-0.453526	0.654133	1.54621	-0.0258747	-0.0637735	1.7977	1.22075	0.0947838	0.874932	1.07796	-0.275329	1.77854	1.64609	-1.40015	-0.811122	0.094077	-0.165722	1.05784	-0.4515	0.758118	1.40118	0.678191	0.809566	1.0931	-0.943171	1.11948	-1.30446	1.16723	0.174821	-0.393649	1.70635	0.917548	-0.116103	1.20961	1.44624	-1.54646	0.90504	-0.381974	0.63219	-0.690118	-0.645958	-0.500513	0.644919	0.171776	0.36701	-1.65176	1.36832	1.19078	2.42921
Mastitis	-0.178243	0.711129	1.5679	0.143975	0.0253196	1.85719	1.20323	0.154354	1.02726	1.09736	-0.155081	1.42784	1.59316	-0.76692	-1.02015	0.625401	-0.356843	1.05914	-0.405767	0.85013	1.35023	0.667547	0.885535	1.13178	-1.0143	0.906616	-1.34012	1.30466	0.212046	-0.839721	1.5465	1.07034	-0.679874	-0.250992	1.67113	-1.63886	0.839165	-0.127718	0.657637	-0.652576	-0.61532	-0.138993	0.611556	0.222525	0.663539	-2.11036	1.54621	1.04422	2.46903
Mastitis	-0.380243	0.666173	1.54059	0.0103877	-0.100216	2.03231	1.2078	0.00814842	0.871385	1.19654	-0.357912	1.53493	1.60201	-1.24888	-0.922368	-0.00977654	-0.167899	1.02113	-0.412004	0.694719	1.39653	0.713557	0.969173	1.07801	-1.00777	1.34477	-1.38772	1.10144	0.172994	-0.295031	1.49843	0.832146	-0.251336	1.2462	1.49413	-1.39337	1.08606	-0.298971	0.595168	-0.666951	-0.65565	-0.379495	0.628635	0.195219	0.488478	-1.47184	1.18835	1.30008	2.42786
Healthy	0.422105	0.854699	0.47897	-0.299135	0.777152	-0.0433825	0.968679	-0.0493307	0.439311	-0.162717	0.781354	0.520891	1.13449	-1.30709	-0.334089	-0.251251	-0.388012	0.413237	-1.03439	0.0162948	1.15177	0.871903	0.431571	0.841349	-1.00872	0.18509	-1.3764	-0.266568	-0.471297	0.181176	0.336426	-0.443415	-0.186114	1.57487	0.122687	-1.34633	0.550865	-0.483674	-0.904555	-0.154295	-1.09349	-0.147996	0.145744	0.781025	-0.442223	-1.36114	0.363051	1.85093	1.47448
Healthy	0.53228	0.872104	0.587576	-0.286908	0.591052	-0.195403	0.974784	-0.208911	0.395603	-0.0201566	0.918431	0.961312	1.1261	-0.920448	-0.193706	-0.201613	-0.41132	0.35932	-0.977046	-0.0515894	1.23522	0.848314	0.373084	0.861088	-1.03454	0.255397	-1.27951	-0.248384	-0.537756	0.061189	0.474649	-0.212798	-0.385917	1.3338	0.176542	-1.34629	0.670058	-0.394343	-1.5201	-0.260196	-0.992796	-0.284155	0.169674	0.646235	-0.495657	-1.62389	0.834753	1.86976	1.35257
Healthy	0.446208	0.87127	0.439014	-0.227899	0.665936	0.0224355	0.955165	-0.211209	0.403041	-0.170646	0.829627	0.46078	1.09522	-1.32186	-0.230741	-0.147526	-0.461393	0.392177	-0.987518	-0.161938	1.22581	0.878097	0.282374	0.861803	-0.990954	0.372297	-1.4904	-0.170527	-0.510466	0.22935	0.449724	-0.137213	-0.136596	1.49418	0.108502	-1.39196	0.531737	-0.480002	-1.21376	-0.217387	-0.9292	-0.316937	0.149176	0.767575	-0.338113	-1.44246	0.521276	1.8769	1.44663
Mastitis	-0.955277	1.00076	1.19129	-0.571738	-1.85031	0.693202	1.03064	0.279372	0.871276	1.32365	-1.29994	0.451435	1.42207	-1.93154	-1.38385	-0.0384927	-0.139714	1.37097	-1.00785	-0.112887	1.14621	-0.99919	1.00297	1.14475	-0.995144	0.294097	-1.19905	1.34659	0.40858	0.123563	-0.0580782	0.0471867	1.12987	1.62269	1.26849	-1.22341	0.448279	-1.29317	-0.328915	-0.536165	0.0475698	-0.555882	1.06742	0.291661	-0.987849	1.03644	-0.119172	-0.424397	1.04308
Mastitis	-0.807489	0.906836	1.22119	-0.5595	-1.87796	0.63551	1.0545	0.367807	0.839113	1.39373	-1.38964	0.52535	1.43681	-1.91788	-1.39638	-0.0974453	0.0645068	1.3829	-0.998821	-0.218002	1.12159	-1.00496	1.0408	1.12812	-0.991549	0.328936	-1.30882	1.44052	0.445923	0.0881388	-0.011958	0.211892	1.32346	1.71498	1.0876	-1.0929	0.491065	-1.2476	-0.323998	-0.488832	0.0667445	-0.51884	1.05162	0.260636	-0.82271	0.906897	0.0174764	-0.600585	1.24392
Mastitis	-0.845366	0.900969	1.25005	-0.590437	-1.96324	0.530689	1.05774	0.214232	0.882866	1.40127	-1.60193	0.393215	1.41889	-1.85588	-1.28171	-0.0512594	-0.176331	1.41146	-0.967714	-0.292557	1.13959	-1.11442	1.16955	1.17011	-0.952054	0.478876	-1.03436	1.48073	0.421422	0.026228	-0.0158273	0.169508	1.34277	1.60827	1.15581	-1.3243	0.511218	-1.29646	0.000247806	-0.609438	0.0326004	-0.589659	1.10273	0.151483	-1.11751	1.04516	-0.12866	-0.709498	0.979174
Healthy	-0.393375	0.974713	0.84674	-0.802217	-1.17844	0.0421435	0.901612	0.0904225	0.589428	0.403109	-0.701998	-0.141864	1.20008	-1.65655	-1.1634	-0.101069	0.0307513	0.965376	-1.24664	-0.406021	1.09046	-0.875382	0.31647	1.05553	-1.00395	0.0477085	-1.3984	0.747586	0.0542195	0.37113	-0.610214	-0.468896	1.13101	1.73975	0.795913	-1.22187	0.390887	-1.31038	-0.780098	-0.297991	-0.107053	-0.295237	0.856832	1.08084	-0.751951	0.822476	-0.486164	0.223781	0.843695
Healthy	-0.456333	1.00584	0.798928	-0.837859	-1.39107	0.131812	0.899112	0.168963	0.579345	0.41941	-0.718305	-0.189379	1.23068	-1.51786	-1.19632	-0.0235081	0.0583884	0.986587	-1.37207	-0.448938	1.1072	-0.895413	0.103917	1.05924	-1.08575	-0.115429	-1.49103	0.714324	0.141464	0.390534	-0.713252	-0.331254	1.07356	1.61299	0.658794	-1.36783	0.42998	-1.36369	-0.93461	-0.388952	-0.247496	-0.428867	0.832599	1.09478	-0.702058	0.957283	-0.375572	0.0182568	0.840003
Healthy	-0.226341	1.0403	0.873588	-0.880897	-1.14486	0.118435	0.922257	0.241145	0.643097	0.446925	-1.03599	-0.026211	1.17893	-1.67489	-1.14791	-0.148288	-0.00729801	1.02639	-1.18227	-0.378736	1.11177	-0.931069	0.385132	1.04817	-1.00823	0.0231417	-1.44688	0.890592	0.102037	0.397865	-0.48472	-0.392818	1.20022	1.48549	0.910493	-1.31321	0.3847	-1.2884	-0.982332	-0.295761	-0.129276	-0.320402	0.87965	0.989565	-0.572498	0.899947	-0.674821	-0.0800818	0.807981
[truncated: 836 more columns]
